# Supplementary material
Source: PubMed Central journal article supplement (PMC9514386)
Supplement: NIHMS1836452-supplement-Supplementary_Material.pdf [file NIHMS1836452-supplement-Supplementary_Material.pdf]

# Supporting Information

## Improved Bst DNA polymerase variants derived via a machine-learning approach

*Inyup Paik<sup>1,2</sup>, Phuoc H. T. Ngo<sup>1,2,3</sup>, Raghav Shroff<sup>1,2,4</sup>, Daniel J. Diaz<sup>2,3</sup>, Andre C. Maranhao<sup>1,2</sup>,  
David J.F. Walker<sup>1,2</sup>, Sanchita Bhadra<sup>1,2</sup> and Andrew D. Ellington<sup>1,2,\*</sup>*

1 Department of Molecular Biosciences, College of Natural Sciences, The University of Texas at  
Austin, Austin, TX 78712, USA

2 Center for Systems and Synthetic Biology, The University of Texas at Austin, Austin, TX  
78712, USA

3 Department of Chemistry, College of Natural Sciences, The University of Texas at Austin,  
Austin, TX 78712, USA

4 CCDC Army Research Lab-South, Austin, TX 78712, USA

\* To whom correspondence should be addressed. Tel: +1-512-232-3424, +1-512-471-6445; Fax:  
+1-512-471-7014; Email: [ellingtonlab@gmail.com](mailto:ellingtonlab@gmail.com)

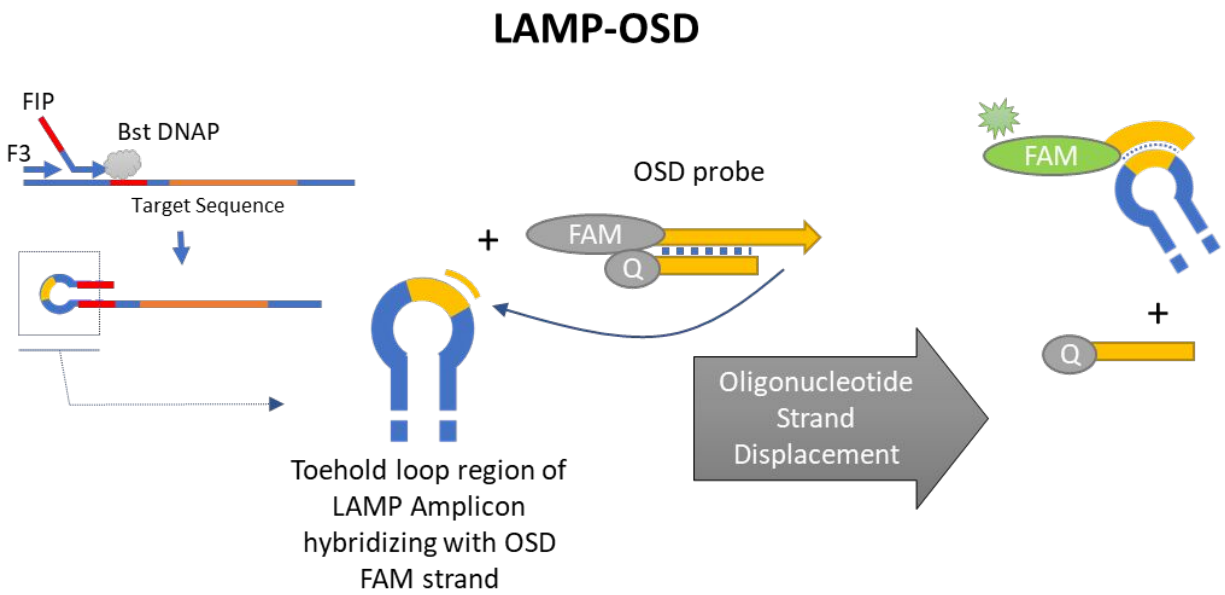

**Figure S1. Schematic diagram of LAMP-OSD (Oligonucleotide Strand**

**Displacement)** FAM and Q represent 6-Carboxyfluorescein (6-FAM) fluorophore and quencher, respectively.

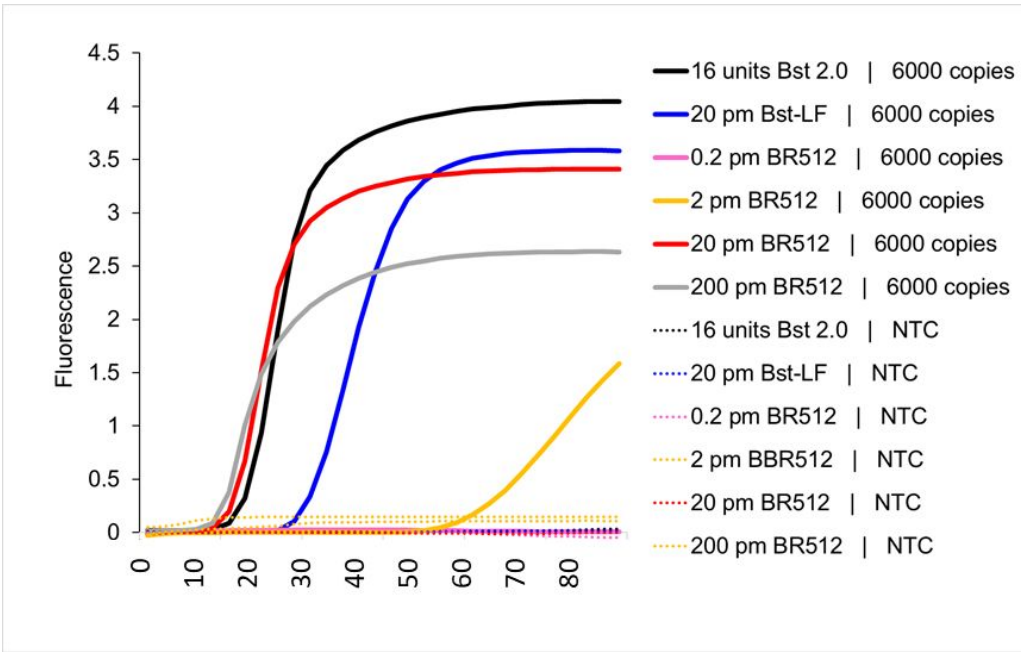

**Figure S2. Effect of varying amounts of Br512 on LAMP-OSD of DNA templates.** Indicated amounts of Br512 were compared with indicated amounts of in-house purified Bst-LF and commercially sourced Bst 2.0 in human *GAPDH* gene-specific LAMP-OSD assays operated in 1X isothermal buffer (NEB). Reactions were seeded with either 6000 copies of *GAPDH* plasmid template or with no specific templates (NTC). Amplification curves generated by real-time measurement of OSD fluorescence at 65 °C are depicted.

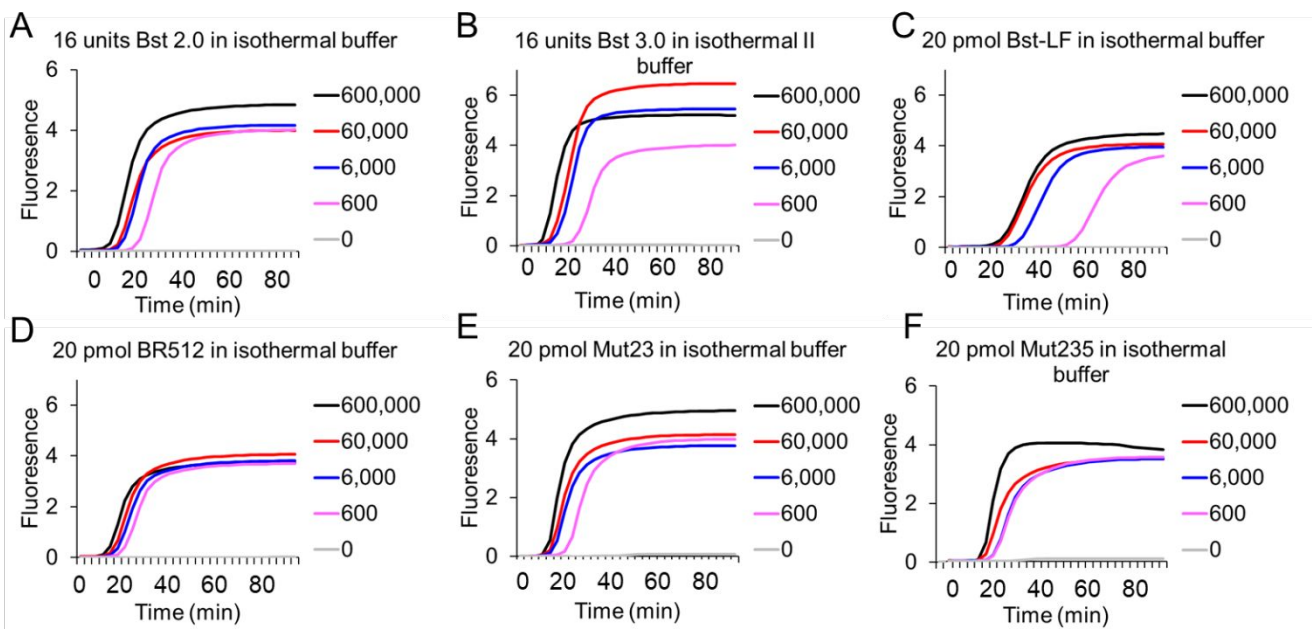

**Figure S3. Comparison of Br512, Mut23, Mut235, Bst-LF, Bst2.0, and Bst3.0 in LAMP-OSD assays of DNA templates.** LAMP-OSD assays for the human *gapd* gene were carried out with 16 units of commercially sourced Bst 2.0 (panel A), 16 units of commercially sourced Bst 3.0 (panel B), 20 pm of in-house purified Bst-LF (panel C), 20 pm of in-house purified Br512 (panel D), 20 pm of in-house purified Mut23 (panel E), or with 20 pm of in-house purified Mut235 (panel F) in the indicated reaction buffer. Amplification curves were observed in real-time at 65 °C by measuring OSD fluorescence in reactions seeded with 600,000 (black traces), 60,000 (red traces), 6,000 (blue traces), 600 (pink traces), and 0 (gray traces) copies of *GAPDH* plasmid templates.

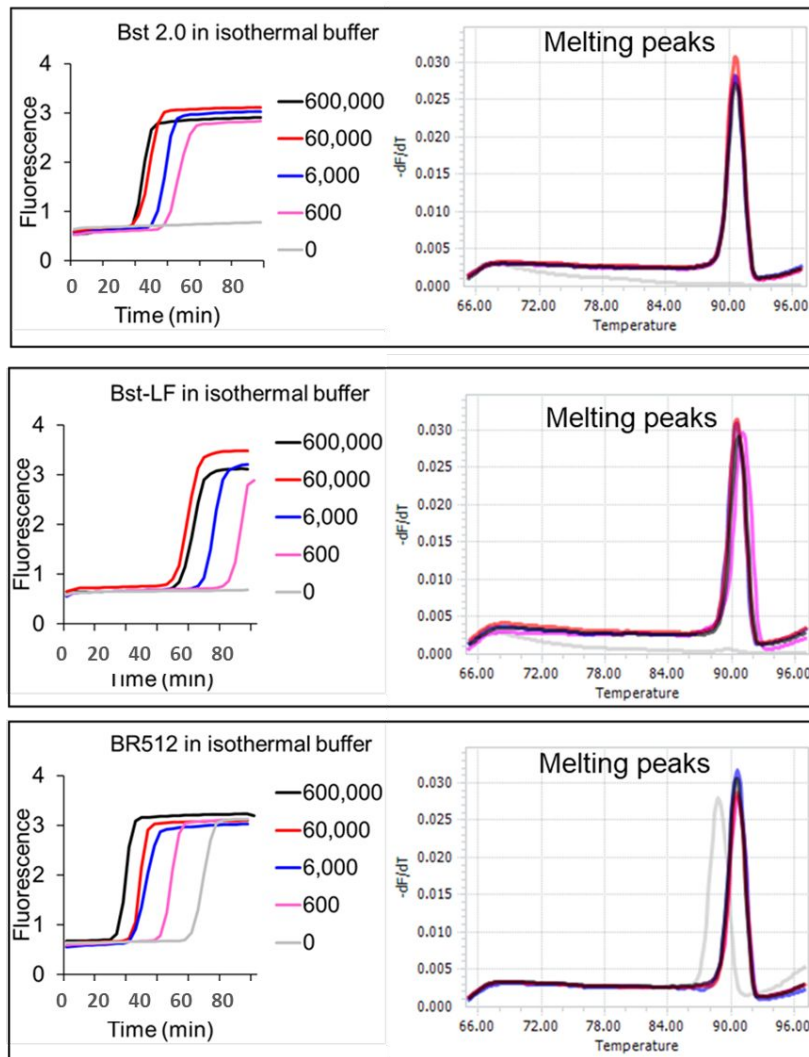

**Figure S4. Comparison of Br512, Bst-LF, and Bst 2.0 in LAMP assays of DNA templates read using EvaGreen intercalating dye. LAMP assays for human *GAPDH* gene were operated using Bst 2.0, Bst-LF, or BR512 in the indicated reaction buffer. Amplification curves observed in real-time at 65 °C by measuring EvaGreen fluorescence in reactions seeded with 600,000 (black traces), 60,000 (red traces), 6,000 (blue traces), 600 (pink traces), and 0 (gray traces) copies of *GAPDH***

plasmid templates are depicted. LAMP amplicons were analyzed using the ‘melt curve analysis’ on LightCycler 96 real-time PCR machine and resulting melting peaks are indicated in the corresponding colored traces.

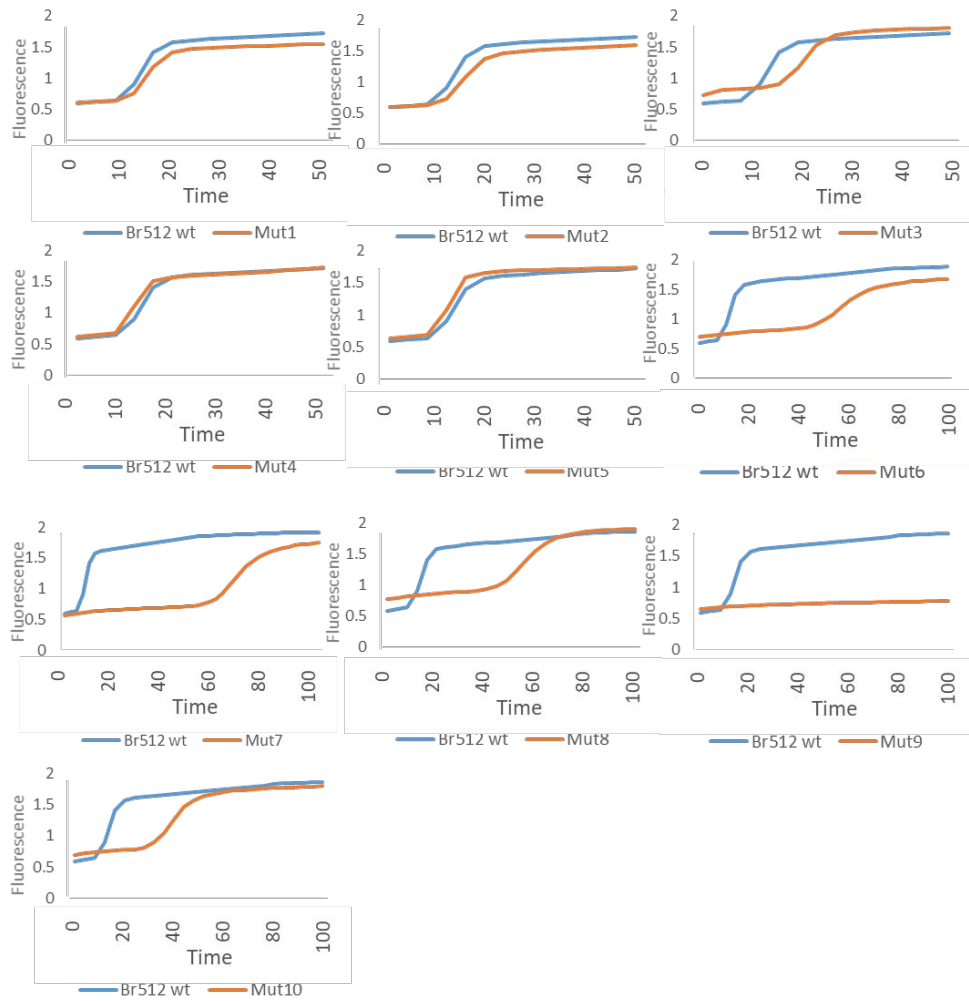

**Figure S5. Initial evaluation of computationally predicted substitutions on Br512 (Bst-LF)**

**activity.** LAMP assays were carried out with a 20 pg ( $6 \times 10^7$  copies) of *GAPDH* DNA template to

assess the effect of the individual mutations suggested by Mutcompute on Br512 activity.

Amplification was observed by EvaGreen dye fluorescence change (Y-axis) over time of incubation in minutes (X-axis) at 65°C. Blue traces indicates Br512 wild type and burnt orange traces are individual mutations (Mut1-Mut10).

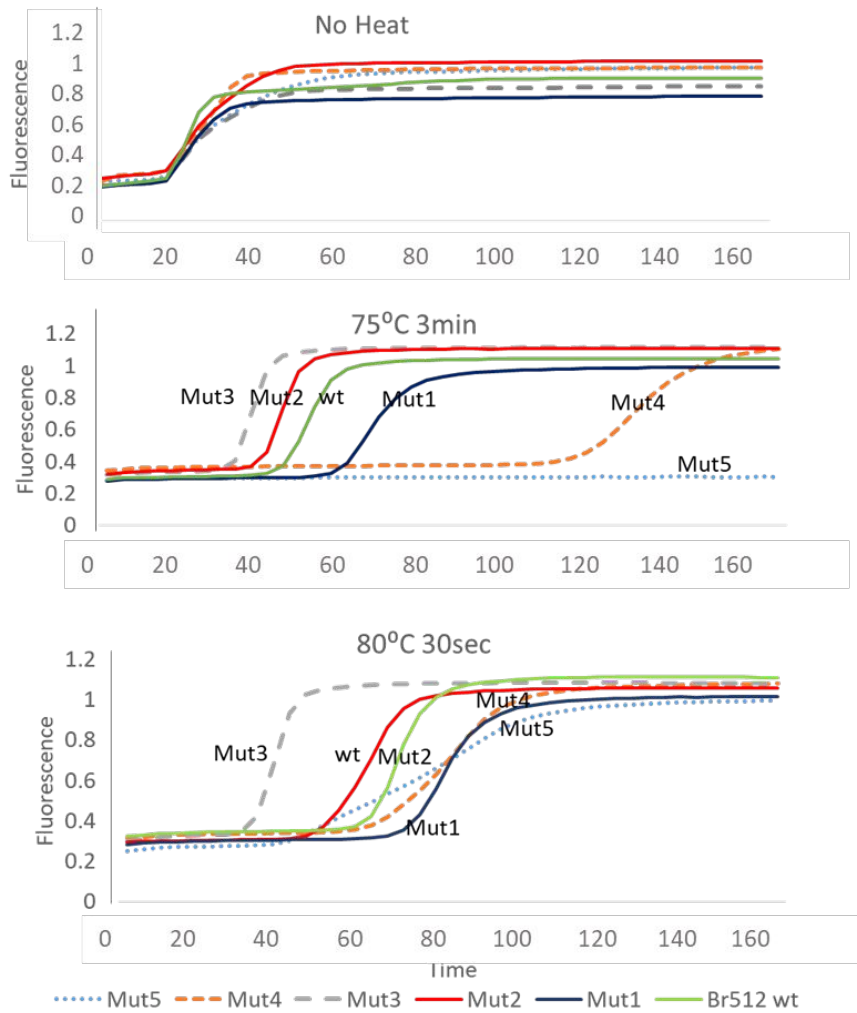



**Figure S6. Heat challenge LAMP assay with computationally predicted single amino acid substitutions.** LAMP assays assembled with wildtype Br512 (wt) or Mutcompute calculated Br512 variants (Mut1 to 5) were subjected to indicated thermal challenges (top panel: no thermal challenge; middle panel: 3 min at 75 °C; lower panel: 30 sec at 80 °C) prior to real time measurement of DNA amplification during continuous incubation at 65°C. Amplification kinetics was determined by measuring EvaGreen fluorescence (Y-axis) over incubation time in minutes (X-axis; hh:mm:ss). Green: Br512 wt (wild type), Dark blue: Mut1, Red: Mut2, Dotted gray: Mut3, Dotted orange: Mut4, Dotted blue: Mut5

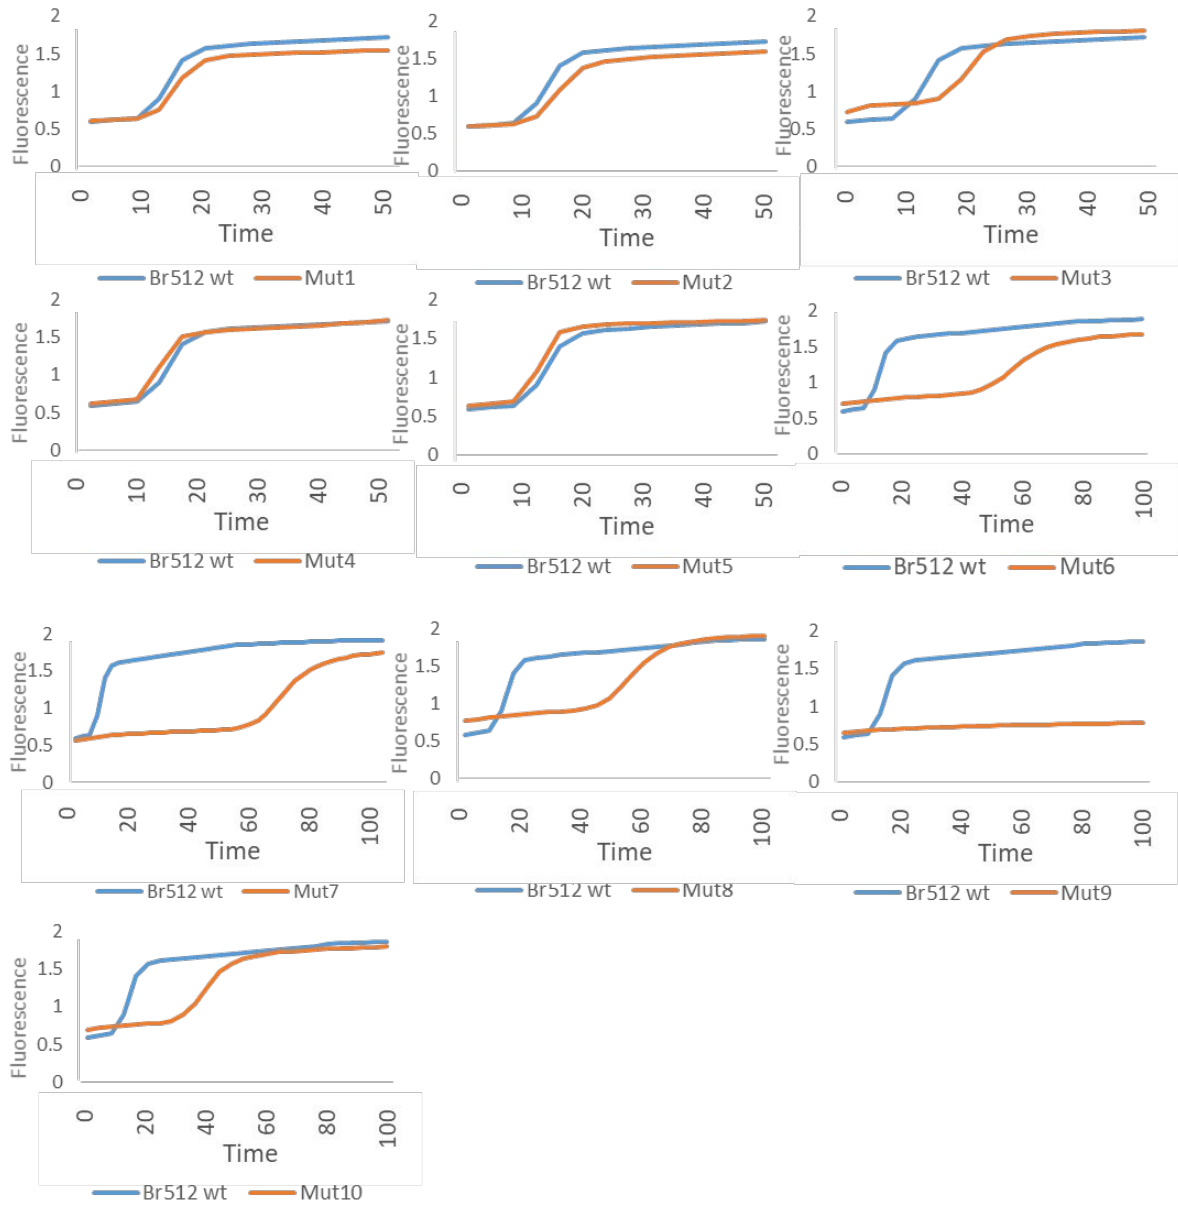

**Figure S7. Heat challenge LAMP assay with double mutation Br512 variants.**

Activities of wild type (blue traces) and the various double mutant Mutcompute Br512 variants (orange traces) were compared in identical LAMP assays containing 20 pg ( $6 \times 10^7$  copies) of

*GAPDH* DNA templates that were subjected to indicated thermal challenges (top panel: no thermal challenge; middle panel: 3 min at 75 °C; lower panel: 30 sec at 80 °C) prior to real time measurement of DNA amplification at 65°C. Representative amplification curves determined by measuring EvaGreen fluorescence (Y-axis) over incubation time (X-axis; minutes) are depicted.

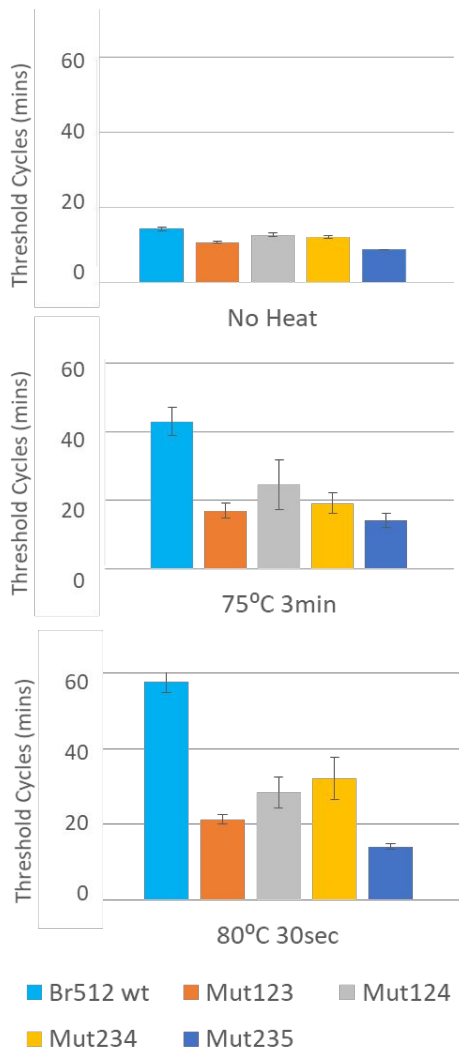

**Figure S8. Threshold cycle (Ct) analysis of triple Mutcompute variants. *GAPDH* LAMP assay**

results shown in Figure 3 b-d were further quantified with Ct values in minutes. Threshold cycles for amplification of 20 pg ( $6 \times 10^7$  copies) *GAPDH* DNA templates were calculated using the Lightcycler96 software (Roche). Lower Ct indicates faster amplification. Upper panel: Ct values for No Heat LAMP, Middle panel: Ct values for 75°C 3min heat challenge LAMP, Lower panel: Ct values for 80°C 30sec heat challenge LAMP. , Error bar=S.D., n=2 for No Heat, n=3 for 75°C and 80°C heat challenge LAMP (Y-axis: Ct in minutes).

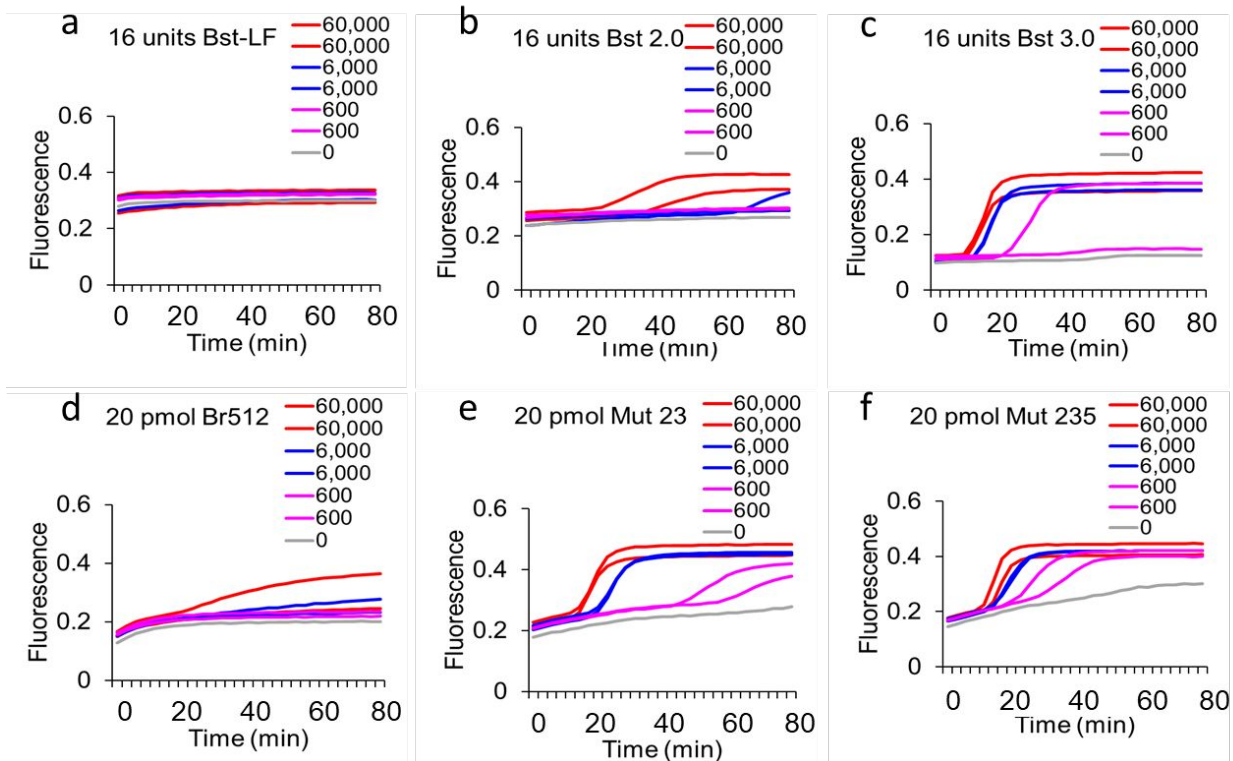

**Figure S9. Comparison of Br512, Mut23, Mut235, Bst-LF, Bst2.0, and Bst3.0 in LAMP-OSD assays executed at 73 °C.** LAMP-OSD assays for the human *GAPDH* gene were carried out with indicated amounts of commercially sourced Bst-LF, Bst 2.0, and Bst 3.0 and in-house purified Br512, Mut23, and Mut235. Amplification curves were observed in real-time at 73 °C by measuring OSD fluorescence in reactions seeded with 60,000 (red traces), 6,000 (blue traces), 600 (pink traces), and 0 (gray traces) copies of *GAPDH* plasmid templates.

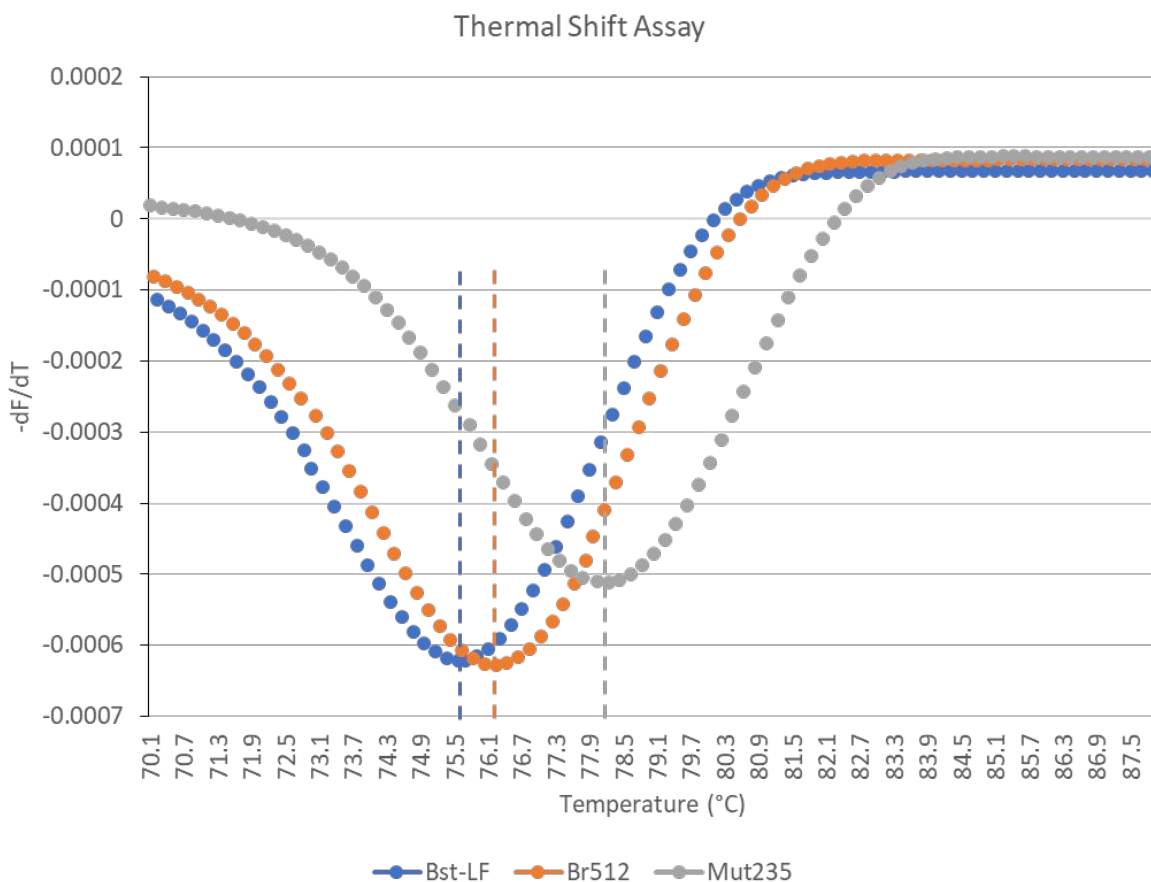

**Figure S10. Protein Thermal Shift Assay for engineered Bst-LF variants.**

Thermal stability of the parental (Bst-LF) and engineered enzyme variants were analyzed using Protein Thermal Shift™ (Thermo Fisher; Catalog Number: 4461146), a dye-based protein thermal shift assay, according to the manufacturer's instructions. The enzymes (5µg) were incubated in a Lightcycler 96 (Roche) real-time PCR machine programmed to ramp temperature from 37 °C to 95 °C at the rate of 0.1 °C/sec while continuously measuring changes in red fluorescence. Melt curves

generated by plotting change in fluorescence ( $dF$ ) as a function of changing temperature ( $dT$ ) are depicted.

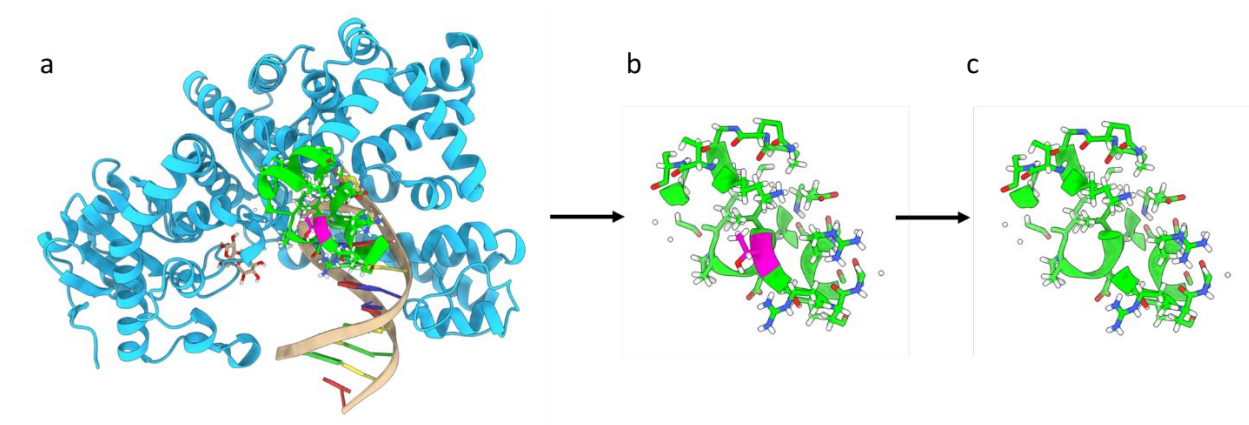

**Figure S11. Generating a microenvironment and a label for self-supervised learning.** (a) Select a focal residue (pink; T493; Mut2) and filter all atoms within a 10-angstrom cube of the alpha carbon (green). The cube orientation is determined by normalizing to the protein backbone and aligning the side chain with the +z axis. (b) Delete remaining protein atoms (blue). (c) Mask the focal residue (pink; T493) by deleting it to generate the microenvironment. Now we can utilize the microenvironment as input to a CNN model and the masked focal residue as a label to conduct



| <b>Supplementary Table 1. Oligonucleotide and template sequences used in the study</b> |                                                                                                                                                                                                                                                                                                                                                                                                                                                                                                                                        |                  |
|----------------------------------------------------------------------------------------|----------------------------------------------------------------------------------------------------------------------------------------------------------------------------------------------------------------------------------------------------------------------------------------------------------------------------------------------------------------------------------------------------------------------------------------------------------------------------------------------------------------------------------------|------------------|
| <b>Name</b>                                                                            | <b>Sequence</b>                                                                                                                                                                                                                                                                                                                                                                                                                                                                                                                        | <b>Use</b>       |
| gapdLAMP.F3                                                                            | GCCACCCAGAAGACTGTG                                                                                                                                                                                                                                                                                                                                                                                                                                                                                                                     | gapd<br>LAMP-OSD |
| gapdLAMP.B3                                                                            | TGGCAGGTTTTTCTAGACGG                                                                                                                                                                                                                                                                                                                                                                                                                                                                                                                   |                  |
| gapdLAMP.FIP                                                                           | CGCCAGTAGAGGCAGGGATGAGGGAAACTGTGGCGTGAT                                                                                                                                                                                                                                                                                                                                                                                                                                                                                                |                  |
| gapdLAMP.BIP                                                                           | GGTCATCCCTGAGCTGAACGGTCAGGTCCACCACTGACAC                                                                                                                                                                                                                                                                                                                                                                                                                                                                                               |                  |
| gapdLAMP.LR                                                                            | TGTTCTGGAGAGCCCCGCGGCC                                                                                                                                                                                                                                                                                                                                                                                                                                                                                                                 |                  |
| gapdOSD.F                                                                              | /56-FAM/CTCACTGGCATGGCCTTCCGTGTCCCCACTGCCAAC/3InvdT/                                                                                                                                                                                                                                                                                                                                                                                                                                                                                   |                  |
| gapdOSD.Q                                                                              | GGACACGGAAGGCCATGCCAGTGAG/3IABkFQ/                                                                                                                                                                                                                                                                                                                                                                                                                                                                                                     |                  |
| gapd template                                                                          | CTAGTAACGGCCGCCAGTGTGCTGGAATTCCCACAGTCCATGCCATCAC<br>TGCCACCCAGAAGACTGTGGATGGCCCCTCCGGGAAACTGTGGCGTGA<br>TGGCCGCGGGGCTCTCCAGAACATCATCCCTGCCTCTACTGGCGCTGC<br>CAAGGCTGTGGGCAAGGTCATCCCTGAGCTGAACGGGAAGCTCACTGG<br>CATGGCCTTCCGTGTCCCCACTGCCAACGTGTCAGTGGTGGACCTGAC<br>CTGCCGTCTAGAAAAACCTGCCAAATATGATGACATCAAGAAGGTGGTG<br>AAGCAGGCGTCGGAGGGCCCCCTCAAGGGCATCCTGGGCTACACTGA<br>GCACCAGGTGGTCTCCTCTGACTTCAACAGCGACACCCACTCCTCCACC<br>TTTGACGCTGGGGCTGGCATTGCCCTCAACGACCACTTTGTCAAGCTCA<br>TTTCCTGGAATTCTGCAGATATCCATCACACTGGCGGCCGCTCGAGC |                  |
| V191L F                                                                                | CTGCTTTTAGAGTTAGAACAGCCTC                                                                                                                                                                                                                                                                                                                                                                                                                                                                                                              | Mut1             |
| V191L R                                                                                | GCGGTCCTGCTCGTTGCGAC                                                                                                                                                                                                                                                                                                                                                                                                                                                                                                                   |                  |
| T493N F                                                                                | GATATCAACAGCCGTAACCTCAATGTAC                                                                                                                                                                                                                                                                                                                                                                                                                                                                                                           | Mut2             |
| T493N R                                                                                | AGGAAGGTAGCGACGACGGTG                                                                                                                                                                                                                                                                                                                                                                                                                                                                                                                  |                  |
| A552G F                                                                                | CTTGAGGGCCCCAAGGAAGAGATG                                                                                                                                                                                                                                                                                                                                                                                                                                                                                                               | Mut3             |

self-supervised learning. MutCompute predicted an asparagine as the most probable amino acid to

belong in the center of this microenvironment

|         |                               |       |
|---------|-------------------------------|-------|
| A552G R | GATCAATTCGTCATGGACTTGCAGT     |       |
| R562V F | CTTTGCGTTCTGGTGCCGGAAGTA      | Mut4  |
| R562V R | ACGCTCCATCTCTTCCTTGGG         |       |
| S371D F | GATTACGATCAGATCGAGCTTCGCG     | Mut5  |
| S371D R | TGCTGCGAAGATCAGCCAGTCC        |       |
| N528E F | GACTTACAGGCTCGTCTGAAGGAAG     | Mut6  |
| N528E R | GATCATAGCTTTCTTGATGATATCTG    |       |
| T510F F | ATGAATTTCCCATCCAGGGGTCAG      | Mut7  |
| T510F R | CGCCATGCGTTCGGCGAAG           |       |
| I304V F | TCTACCTACGTTGAGGGTCTGTAAAGGTC | Mut8  |
| I304V R | CTGCAGCTTGCCCAGCTGGC          |       |
| Y303H F | TCTACCCACATTGAGGGTCTGTAAAGGTC | Mut9  |
| Y303H R | CTGCAGCTTGCCCAGCTGGC          |       |
| V572A F | GGCCGCGACGCTGCGCGTAC          | Mut10 |
| V572A R | TGTTCCACTTCCGGCACCAG          |       |

**Supplementary Table 2. Full sequence of pKAR2-Br512; 6218 bp. Br512 is highlighted.**

Detailed annotation of Br512

4285-4311 : 8x His

4312-4452 : HP47

4453-4476 : 2(GS)3(A)P

4476-6216 : Bst-LF

```
ATCCTAAGCTTAATTTAGCATAACCCCTTGGGGCCTCTAAACGGGTCTTGAGGGGT
TTTTTGAGCTGAGCTTGGACTCCTGTTGATAGATCCGGCCGGTAATGACCTCAGAA
CTCCATCTGCCTAATGGAGTGATTCTAGCCGGTCGTTACACGTGGAACGGGAACT
GCCAGACATCAAATAAAAACAAAAGGCTCAGTCGGAAGACTGGGCCTTTTGTTTTAT
CTGTTGTTTGTTCGGTGAACACTCTCCCGGAAAACCTCACGTTAAGGGATTTTGGTCA
TGAGATTATCAAAAAGGATCTTCACCTAGATCCTTTTAAACTAGTGAAGTTACCATC
ACGGAAAAAGGTTATGCTGCTTTTAAAGACCCACTTTCACATTTAAGTTGTTTTTCTAA
TCCGCAAATGATCAATTCAAGGCCGAATAAGAAGGCTGGCTCTGCACCTTGGTGAT
CAAATAATTCGATAGCTTGTTCGTAATAATGGCGGCATACTATCAGTAGTAGGTGTTT
CCCTTTCTTCTTTAGCGACTTGATGCTCTTGATCTTCCAATACGCAACCTAAAGTAA
AATGCCCCACTGCACTGAGTGCATATAATGCATTCTCTAGTGAAAAACCTTGTGG
CATAAAAAGGCTAATTGATTTTCGAGAGTTTCATACTGTTTTTCTGTAGGCCGTGTA
CCTAAATGTACTTTTGTCCATCGCGATGACTTAGTAAAGCACATCTAAACTTTTA
GCGTTATTACGTAAAAAATCTTGCCAGCTTTCCCTTCTAAAGGGCAAAAAGTGAGT
ATGGTGCCTATCTAACATCTCAATGGCTAAGGCGTCGAGCAAAGCCCGCTTATTTT
```

TTACATGCCAATACAATGTAGGCTGCTCTACACCTAGCTTCTGGGCGAGTTTACGG  
GTTGTTAAACCTTCGATTCCGACCTCATTAAGCAGCTCTAATGCGCTGTTAATCACT  
TTACTTTTATCTAAACGAGACATCATTAACCTCCTCAAGAGGATCGAATAGTTATTA  
CCAATGCTTAATCAGTGAGGCACCTATCTCAGCGATCTGTCTATTTTCGTTTCATCCAT  
AGTTGCCTGACTCCCCGTCGTGTAGATAACTACGATACGGGAGGGCTTACCATCT  
GGCCCCAGTGCTGCAATGATACCGCGAGAGCCACGCTCACCGGCTCCAGATTTAT  
CAGCAATAAACCAGCCAGCCGGAAGGGCCGAGCGCAGAAGTGGTCCTGCAACTTT  
ATCCGCCTCCATCCAGTCTATCAATTGTTGCCGGAAGCTAGAGTAAGTAGTTCGC  
CAGTTAATAGTTTGCGCAACGTTGTTGCCATTGCTACAGGCATCGTGGTGTACGCG  
TCGTGTTTTGGTATGGCTTCATTCAGCTCCGGTCCCAACGATCAAGGCGAGTTAC  
ATGATCCCCATGTTGTGCAAAAAGCGGTTAGCTCCTTCGGTCCCGATCGTTG  
TCAGAAGTAAGTTGGCCGCAGTGTTATCACTCATGGTTATGGCAGCACTGCATAAT  
TCTCTTACTGTTCATGCCATCCGTAAGATGCTTTTCTGTGACTGGTGAGTACTCAACC  
AAGTCATTCTGAGAATAGTGTATGCGGCGACCGAGTTGCTCTTGCCCGGCGTCAAT  
ACGGGATAATACCGCGCCACATAGCAGAACTTTAAAAGTGCTCATCATTGGAAAAC  
GTTCTTCGGGGCGAAAACCTCTCAAGGATCTTACCGCTGTTGAGATCCAGTTCGATG  
TAACCCACTCGTGCACCCAACCTGATCTTCAGCATCTTTTACTTTACCAGCGTTTCT  
GGGTGAGCAAAAACAGGAAGGCAAAATGCCGCAAAAAGGGAATAAGGGCGACA  
CGGAAATGTTGAATACTCATACTCTTCCTTTTTCAATATTATTGAAGCATTATCAGG  
GTTATTGTCTCATGAGCGGATACATATTTGAATGTATTTAGAAAAATTTTTTAAGGCA  
GTTATTGGTGCCGCTTAAACGCCTGGGGTAATGACTCTCTAGCTTGAGGCATCAAA  
TAAACGAAAGGCTCAGTCGAAAGACTGGGCCTTTCGTTTTATCTGTTGTTTGTGCG  
GTGAACGCTCTCCTGAGTAGGACAAATCCGCCCTCTAGATTACGTGCAGTCGATG  
ATAAGCTGTCAAACGGAATTTCCGGGCAGCGTTGGGTCTGGCCACGGGTGCGCC  
GGTGTGAAATACCGCACAGATGCGTAAGGAGAAAATACCGCATCAGGCGCTCTTC  
CGCTTCTCGCTCACTGACTCGCTGCGCTCGGTCTCGGCTGCGGCGAGCGGT  
ATCAGCTCACTCAAAGGCGGTAATACGGTTATCCACAGAATCAGGGGATAACGCA  
GGAAAGAACATGTGAGCAAAAGGCCAGCAAAAGGCCAGGAACCGTAAAAAGGCC  
GCGTTGCTGGCGTTTTTCCATAGGCTCCGCCCCCTGACGAGCATCACAAAAATC  
GACGCTCAAGTCAGAGGTGGCGAAACCCGACAGGACTATAAAGATAACAGGCGTT  
TCCCCCTGGAAGCTCCCTCGTGCGCTCTCCTGTTCCGACCCTGCCGCTTACCGGA  
TACCTGTCCGCCTTTCTCCCTTCGGGAAGCGTGGCGCTTCTCATAGCTCACGCTG  
TAGGTATCTCAGTTCGGTGTAGGTGCTTCGCTCCAAGCTGGGCTGTGTGCACGAA  
CCCCCGTTTACGCCCGACCGCTGCGCCTTATCCGGTAACTATCGTCTTGAGTCCA  
ACCGGTAAGACACGACTTATCGCCACTGGCAGCAGCCACTGGTAACAGGATTAG  
CAGAGCGAGGTATGTAGGCGGTGCTACAGAGTTCTTGAAGTGGTGGCCTAACTAC  
GGCTACACTAGAAGGACAGTATTTGGTATCTGCGCTCTGCTGAAGCCAGTTACCTT  
CGGAAAAAGAGTTGGTAGCTCTTGATCCGGCAAACAAACCACCGCTGGTAGCGGT  
GGTTTTTTTTGTTTGCAGCAGCAGATTACGCGCAGAAAAAAGGATCTCAAGAAGA  
TCCTTTGATCTTTTCTACGGGGTCTGACGCTCAGTGAACGAAAACCTCACGTTAAG  
GGATTTTGGTCATGGAATTAATTCTTAGAAAACTCATCGAGCATCAAATGAAACTG  
CAATTTATTCATATCAGGATTATCAATACCATATTTTTGAAAAAGCCGTTTCTGTAAT  
GAAGGAGAAAACCTACCGAGGCAGTTCCATAGGATGGCAAGATCCTGGTATCGGT  
CTGCGATTCCGACTCGTCCAACATCAATACAACCTATTAATTTCCCCTCGTCAAAA  
TAAGGTTATCAAGTGAGAAATCACCATGAGTGACGACTGAATCCGGTGAGAATGGC

AAAAGTTTATGCATTTCTTTCCAGACTTGTTCAACAGGCCAGCCATTACGCTCGTCA  
TCAAATCACTCGCATCAACCAAACCGTTATTCATTCGTGATTGCGCCTGAGCGAA  
GACGAAATACGCGATCGCTGTTAAAAGGACAATTACAAACAGGAATCGAATGCAAC  
CGGCGCAGGAACACTGCCAGCGCATCAACAATATTTTACCTGAATCAGGATATTC  
TTCTAATACCTGGAATGCTGTTTTCCCGGGGATCGCAGTGGTGAGTAACCATGCAT  
CATCAGGAGTACGGATAAAATGCTTGATGGTCGGAAGAGGCATAAATTCCGTCAG  
CCAGTTTAGTCTGACCATCTCATCTGTAACATCATTGGCAACGCTACCTTTGCCATG  
TTTCAGAAACAACACTCTGGCGCATCGGGCTTCCCATACAATCGATAGATTGTCGCAC  
CTGATTGCCCGACATTATCGCGAGCCATTTATACCCATATAAATCAGCATCCATGT  
TGGAATTTAATCGCGGCCTAGAGCAAGACGTTTCCCGTTGAATATGGCTCATAACA  
CCCCTTGTATTACTGTTTATGTAAGCAGACAGTTTTATTGTGTAATCGTTAATCCGC  
AAATAACGTAAAACCCGCTTCGGCGGGTTTTTTTATGGGGGGAGTTTAGGGAAAG  
AGCATTTGTCATCATGACCATGACATTAACCTATAAAAATAGGCGTATCACGAGGC  
CCTTTCCCTAGGGTCTTCACACTCTATCATTGATAGAGTTAATACGACTCACTATAG  
GGTCCCTATCAGTGATAGAGAAATTCGTACTIONGAGCACAGCTGTCACCGGATGTG  
CTTTCCGGTCTGATGAGTCCGTGAGGACGAAACAGCCTCTACAAATAATTTGTTTA  
AACTAGTTAGATAAAGGAGGTTACATATGCACCATCATCACGGTCATCACCACCATC  
CGCGTGGTGTTGACCCGAGCCGTAAGGAGAACCACCTGTCTGACGAAGACTTCAA  
GGCGGTGTTCCGGTATGACCCGTTCTGCGTTCGCGAACCTGCCGCTGTGGAAACAA  
CAGAACCTGAAGAAGGAGAAAGGTCTGTTCCGTTCTGGAAGCGCAGCAGCACCTA  
AGATGGCATTACATTGGCCGATCGTGTACCCGAAGAGATGCTGGCAGACAAGGC  
AGCCTTGGTCGTGGAGGTAGTTGAGGAGAACTATCACGACGCACCGATTGTTGGA  
ATCGCCGTGGTCAATGAACATGGTCGCTTCTTCTTTCGCCCCTGAGACTGCGTTGG  
CCGACCCACAATTCGTGGCCTGGTTAGGAGATGAAACGAAGAAGAAGTCAATGTT  
CGACAGCAAACGCGCAGCCGTAGCTCTGAAGTGGAAAGGAATTGAGCTGTGTGGT  
GTGAGTTTTCGACCTTCTTTAGCAGCGTACTTGCTTGATCCCGCTCAAGGCGTCSA  
CGACGTGGCAGCCGCTGCCAAGATGAAGCAATATGAAGCGGTGCGTCCGGATGA  
GGCTGTGTACGGGAAGGGAGCTAAACGCGCGGTGCCTGATGAACCCGTGCTTGC  
TGAGCACTTGGTACGCAAGGCTGCGGCTATCTGGGAGCTGGAGCGTCCCTTCCTG  
GATGAGTTGCGTCGCAACGAGCAGGACCGCCTGCTTGATAGAGTTAGAACAGCCTC  
TTAGCTCTATTCTTGCCGAGATGGAGTTCGCTGGTGTCAAAGTAGATAACCAAGCGC  
CTTGAGCAAATGGGTAAGGAGTTGGCTGAACAACACTGGGCACAGTGGAAACAGCGTA  
TCTACGAACTGGCCGGTCAGGAGTTCAACATCAACAGCCCCAAGCAGCTGGGAGT  
GATCCTGTTTCGAGAAGTTGCAGCTGCCAGTATTGAAGAAGACTAAGACTGGCTACA  
GTACCTCGGCTGACGTACTIONGGAGAAGCTGGCTCCTTACCATGAGATCGTGGAGAA  
CATCTTGCACACTACCGCCAGCTGGGCAAGCTGCAGTCTACCTACATTGAGGGTCTG  
TTAAAGGTGCTGCGTCCAGACACGAAGAAGGTGCATACGATCTTCAATCAGGCGC  
TGACCCAAACTGGTCGTTTGTGCTCCACAGAGCCCAATCTTCAGAATATCCCTATT  
CGTCTTGAGGAAGGCCGCAAGATTCGCCAGGCCTTCGTTCCCTTCGGAATCGGACT  
GGCTGATCTTCGCAGCAGATTACTCACAGATCGAGCTTCGCGTGTTGGCACATATC  
GCGGAGGATGACAACCTAATGGAGGCGTTCCGCCGCGATCTGGATATCCATACTA  
AGACCGCGATGGATATCTTCCAAGTGTCAGAAGACGAGGTAACACCCGAACATGCG  
ACGCCAGGCGAAAGCGGTTAACTTCGGCATCGTCTACGGCATCAGCGACTATGGC  
CTGGCCAGAACTTGAACATCAGCCGCAAGGAGGCAGCCGAGTTCATCGAGCGCT  
ACTTCGAGAGTTTCCAGGTGTGAAGCGTTATATGGAGAATATCGTACAAGAGGCG

AAGCAGAAAGGCTACGTGACCACGCTGTTACACCGTCGTCGCTACCTTCCTGATAT  
CACTAGCCGTAAC TTCAATGTACGTTCCCTTCGCCGAACGCATGGCGATGAATACCC  
CCATCCAGGGGTCAGCTGCAGATATCATCAAGAAAGCTATGATCGACTTAAACGCT  
CGTCTGAAGGAAGAACGCTTACAGGCGCACCTCTTACTGCAAGTCCATGACGAATT  
GATCCTTGAGGCGCCCAAGGAAGAGATGGAGCGTCTTTGCCGTCTGGTGCCGGA  
AGTAATGGAACAGGCCGTCACGCTGCGCGTACCTCTGAAAGTCGATTACCACTAC  
GGCTCCACCTGGTATGACGCCAAGTAAGG
